# Supplementary material
Source: ML conference proceedings conference paper supplement (https://openreview.net/forum?id=uq6nIOoPGG)

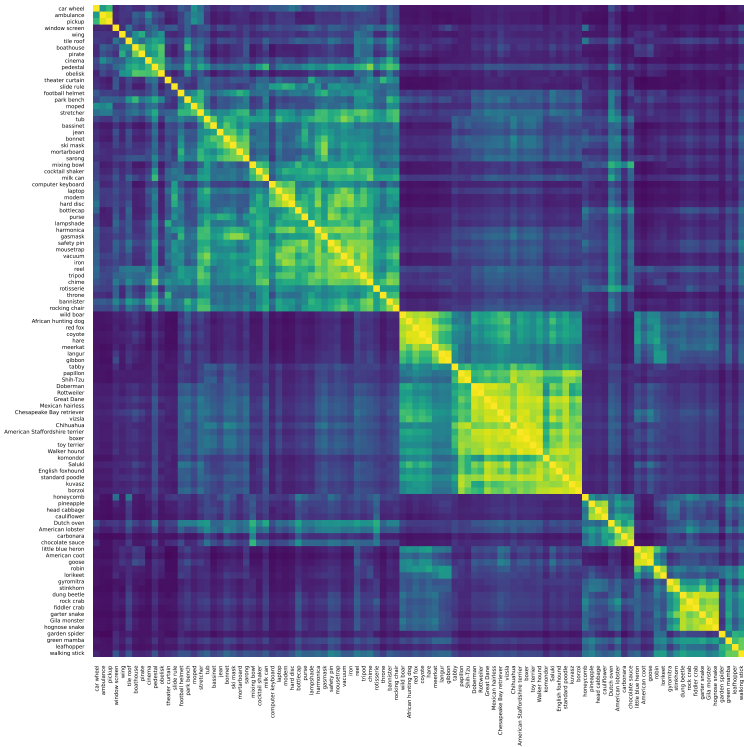

Supplement: supplementary_material [file class_similarity_heatmap.pdf › coarse_reps_iclr/class_similarity_heatmap.pdf]

Linear Accuracy over Epochs by Local Weight

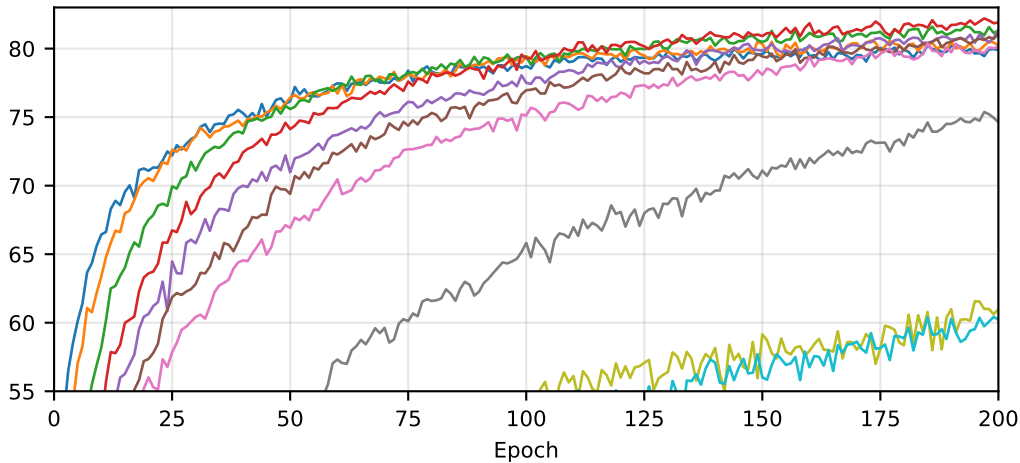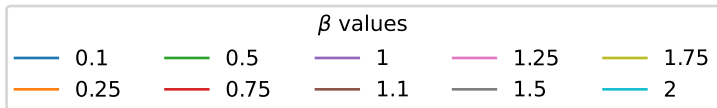

Supplement: supplementary_material [file beta.pdf › coarse_reps_iclr/reports/beta/beta.pdf]

Linear Accuracy over Epochs by Local Weight

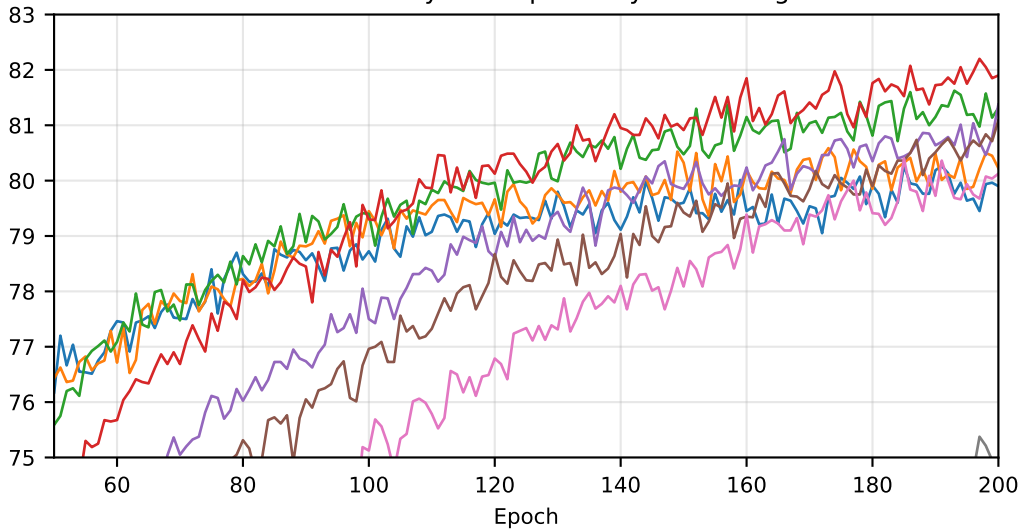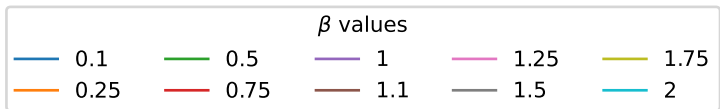

Supplement: supplementary_material [file beta_zoom.pdf › coarse_reps_iclr/reports/beta/beta_zoom.pdf]

Linear Accuracy over Epochs by Local Weight

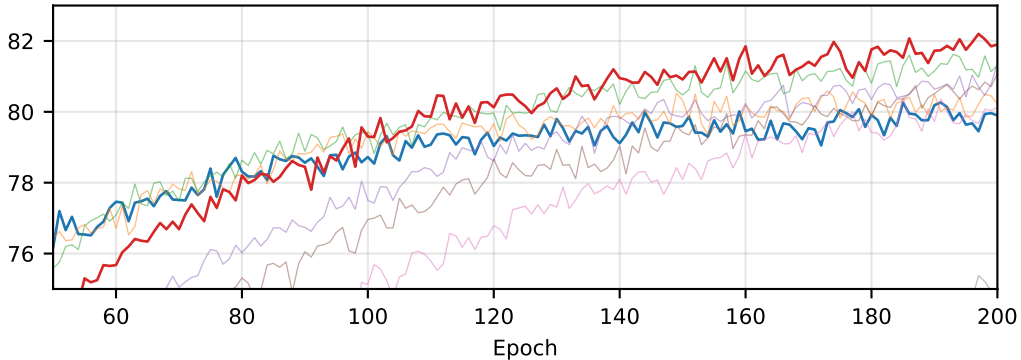

Supplement: supplementary_material [file beta_zoom_highlight.pdf › coarse_reps_iclr/reports/beta/beta_zoom_highlight.pdf]

CIFAR10 RN18 — Knn Top1

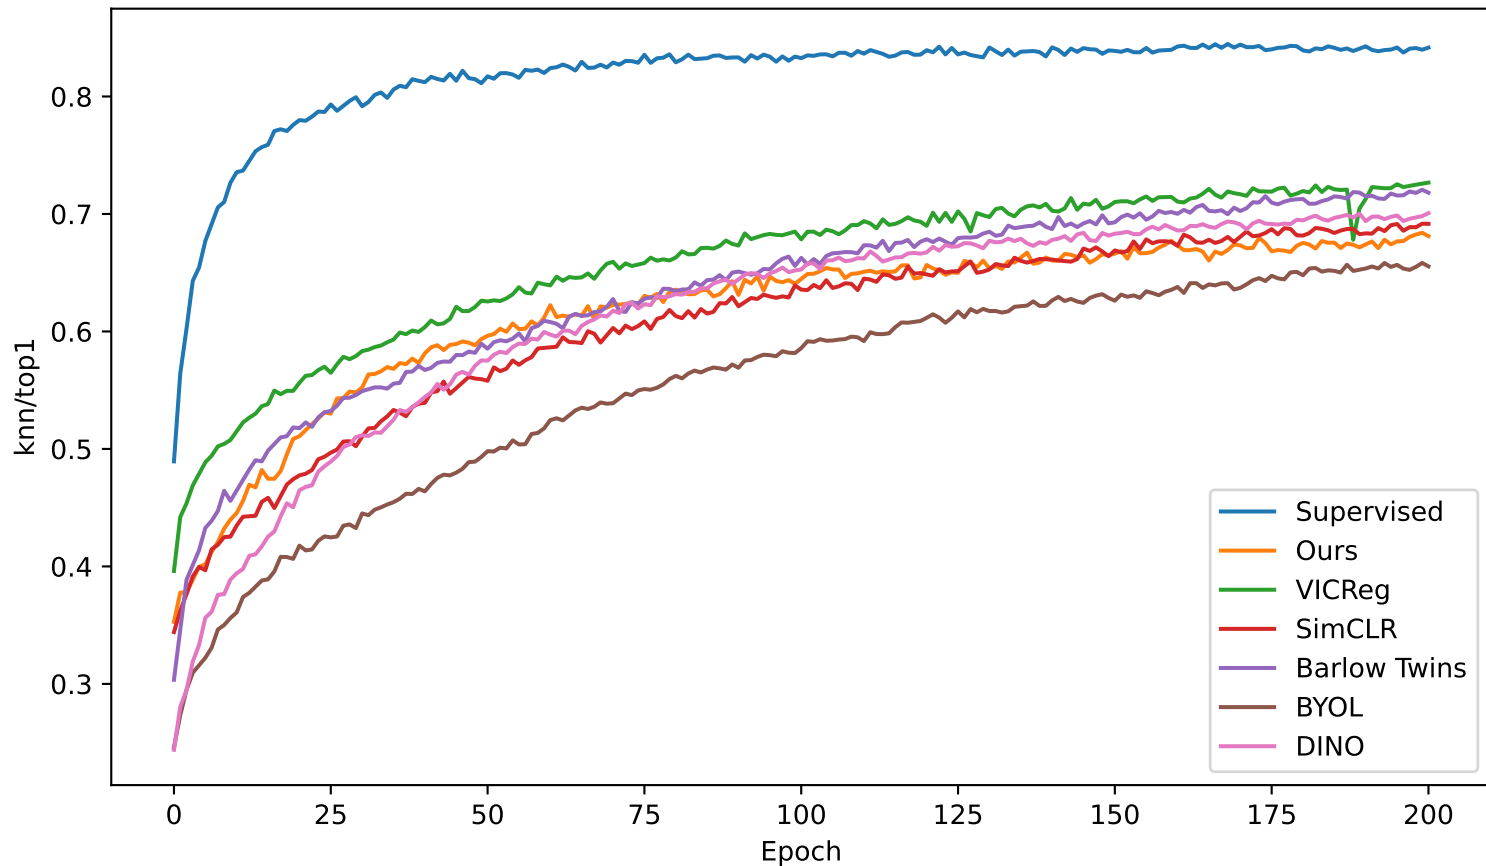

Supplement: supplementary_material [file cifar10_resnet18_knn_top1.pdf › coarse_reps_iclr/reports/cifar10-figs/cifar10_resnet18_knn_top1.pdf]

CIFAR10 RN18 — Knn Top5

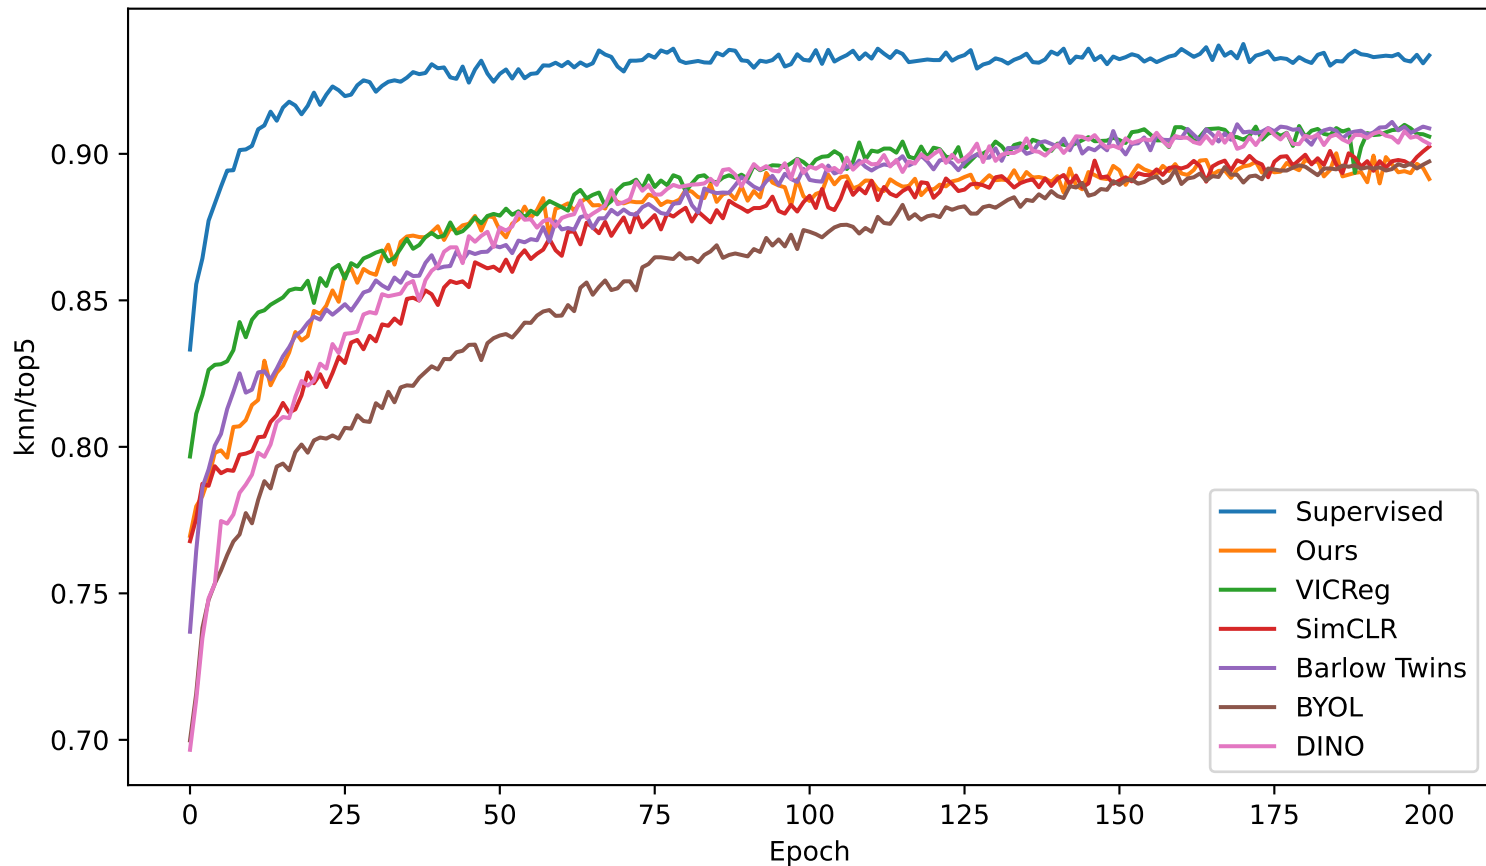

Supplement: supplementary_material [file cifar10_resnet18_knn_top5.pdf › coarse_reps_iclr/reports/cifar10-figs/cifar10_resnet18_knn_top5.pdf]

CIFAR10 RN18 — Lin Top1

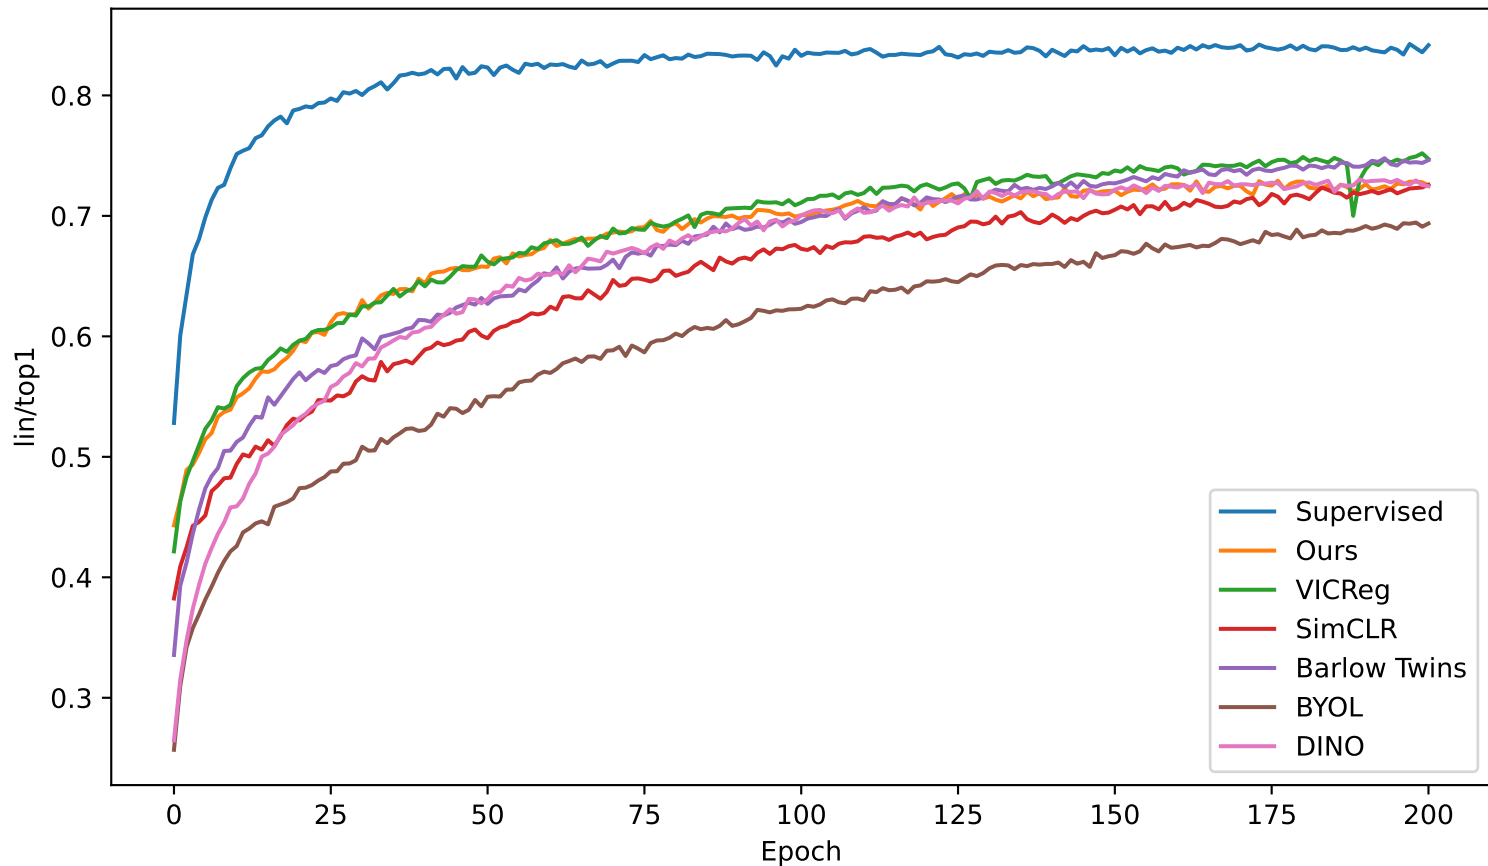

Supplement: supplementary_material [file cifar10_resnet18_lin_top1.pdf › coarse_reps_iclr/reports/cifar10-figs/cifar10_resnet18_lin_top1.pdf]

CIFAR10 RN18 — Lin Top5

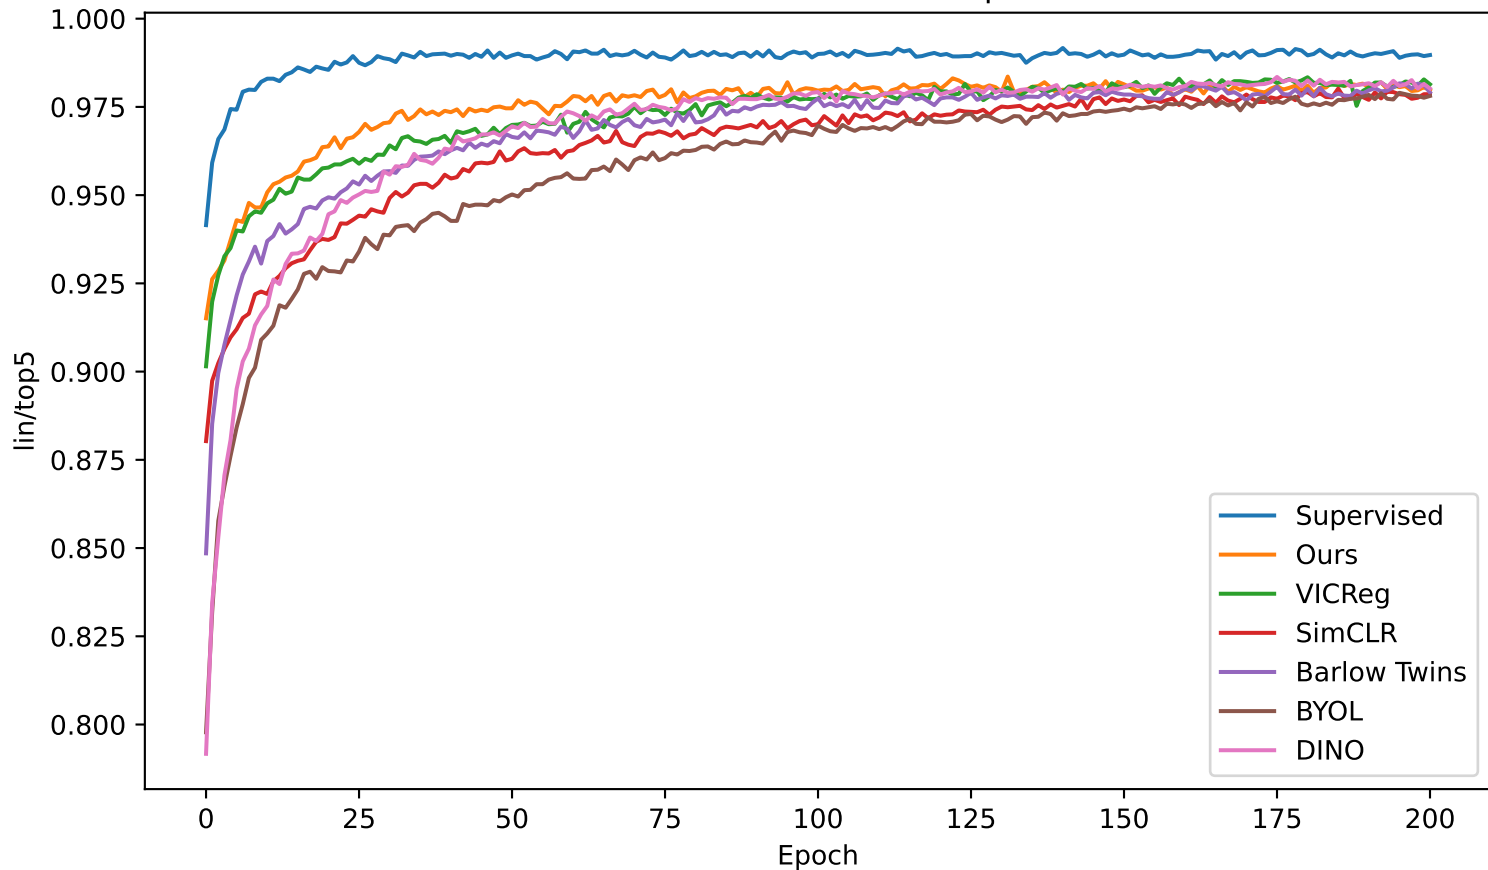

Supplement: supplementary_material [file cifar10_resnet18_lin_top5.pdf › coarse_reps_iclr/reports/cifar10-figs/cifar10_resnet18_lin_top5.pdf]

# Linear Accuracy over Epochs by Projector Dimensions

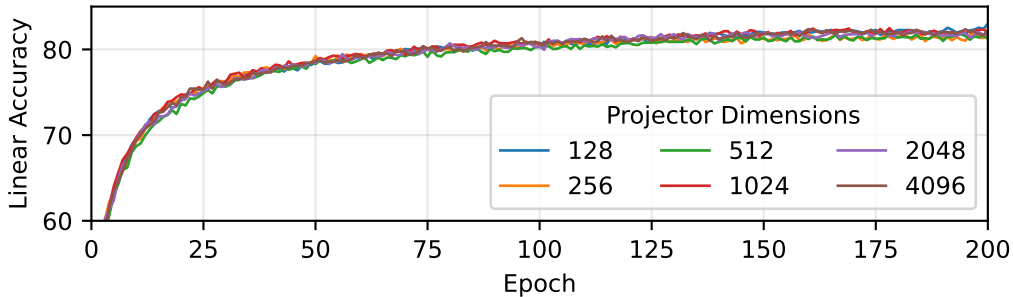

Supplement: supplementary_material [file dimensions.pdf › coarse_reps_iclr/reports/dimension-stl10/dimensions.pdf]

# Linear Top-1

## CIFAR10

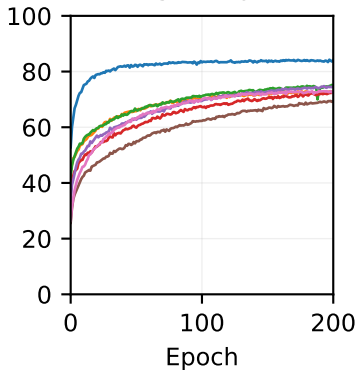

## STL10

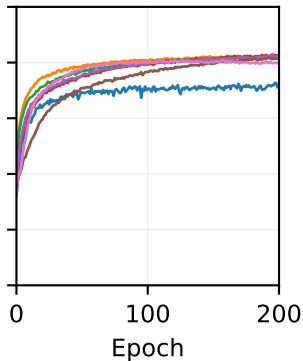

## LC25000

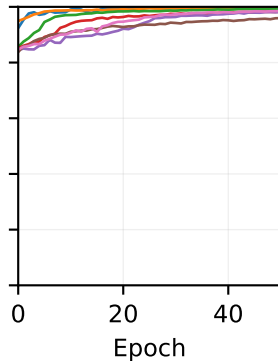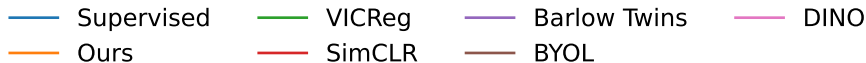

Supplement: supplementary_material [file lin_top1_3col.pdf › coarse_reps_iclr/reports/figs/lin_top1_3col.pdf]

CIFAR10

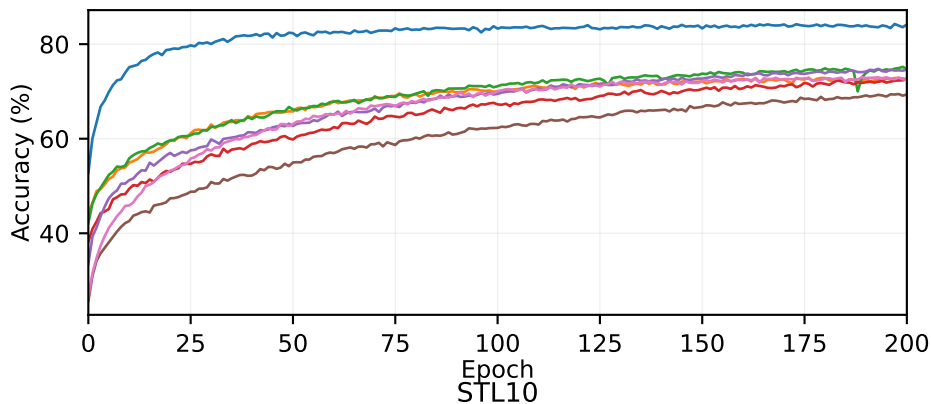

STL10

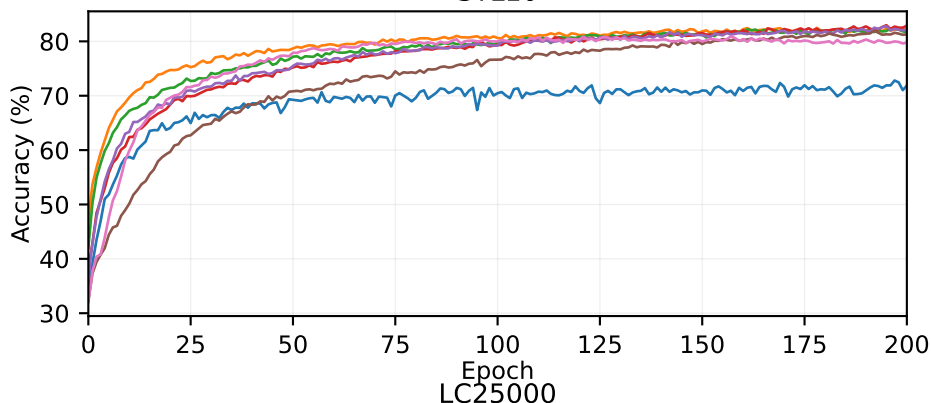

LC25000

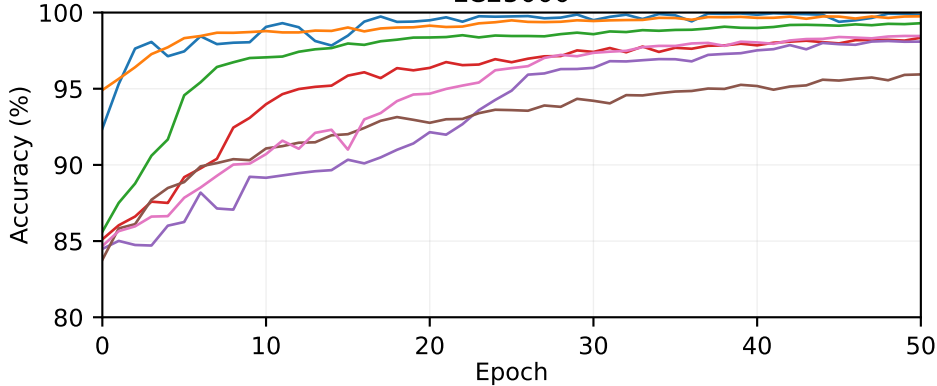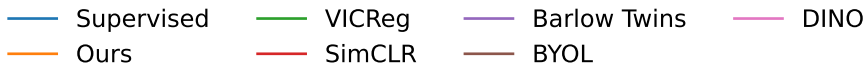

Supplement: supplementary_material [file lin_top1_vertical.pdf › coarse_reps_iclr/reports/figs/lin_top1_vertical.pdf]

STL10 RN18 — Knn Top1

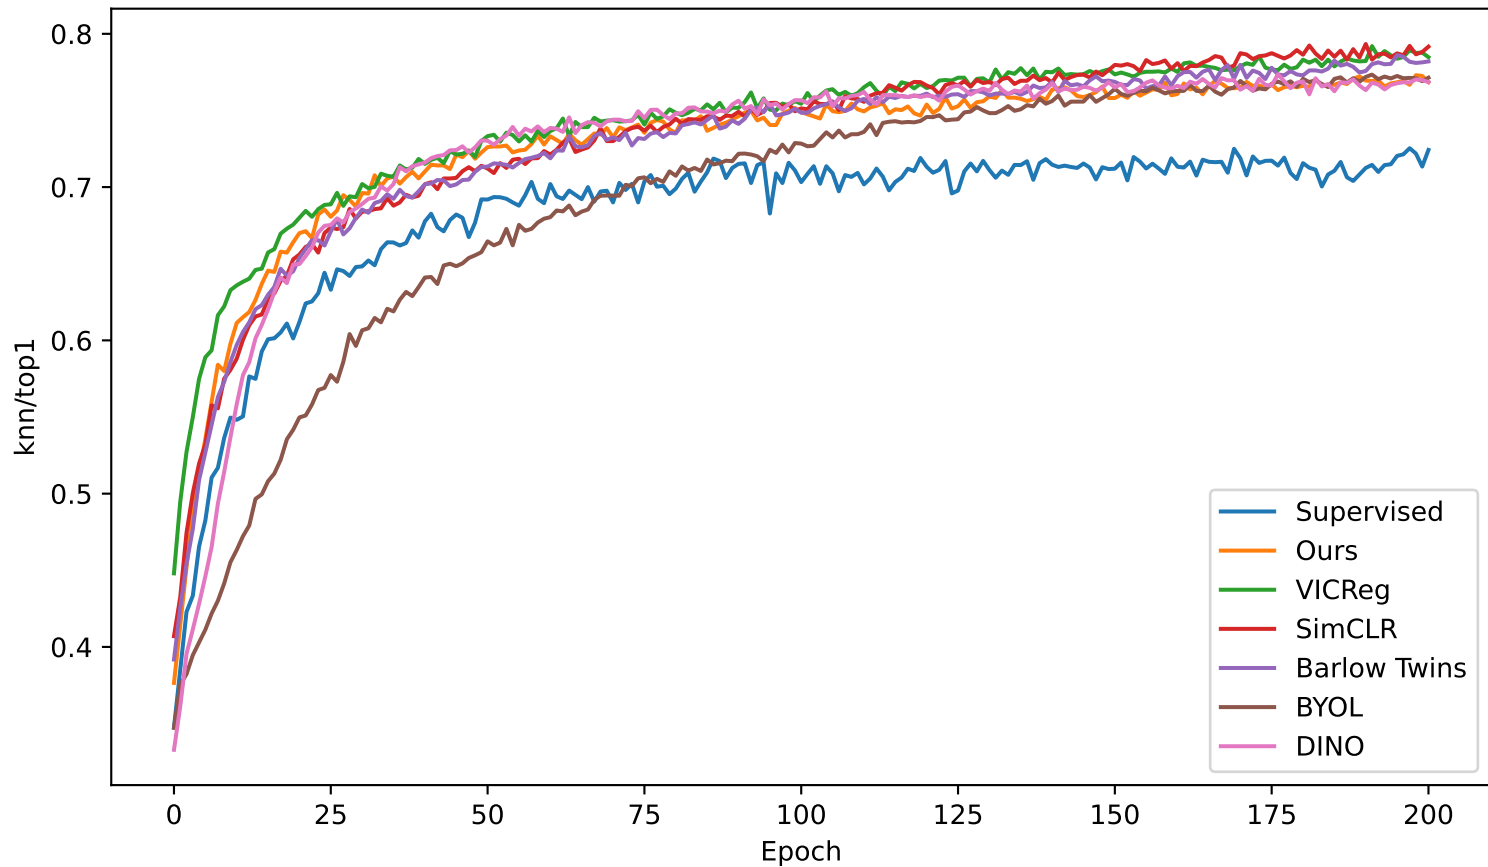

Supplement: supplementary_material [file stl10_resnet18_knn_top1.pdf › coarse_reps_iclr/reports/figs/stl10_resnet18_knn_top1.pdf]

STL10 RN18 — Knn Top5

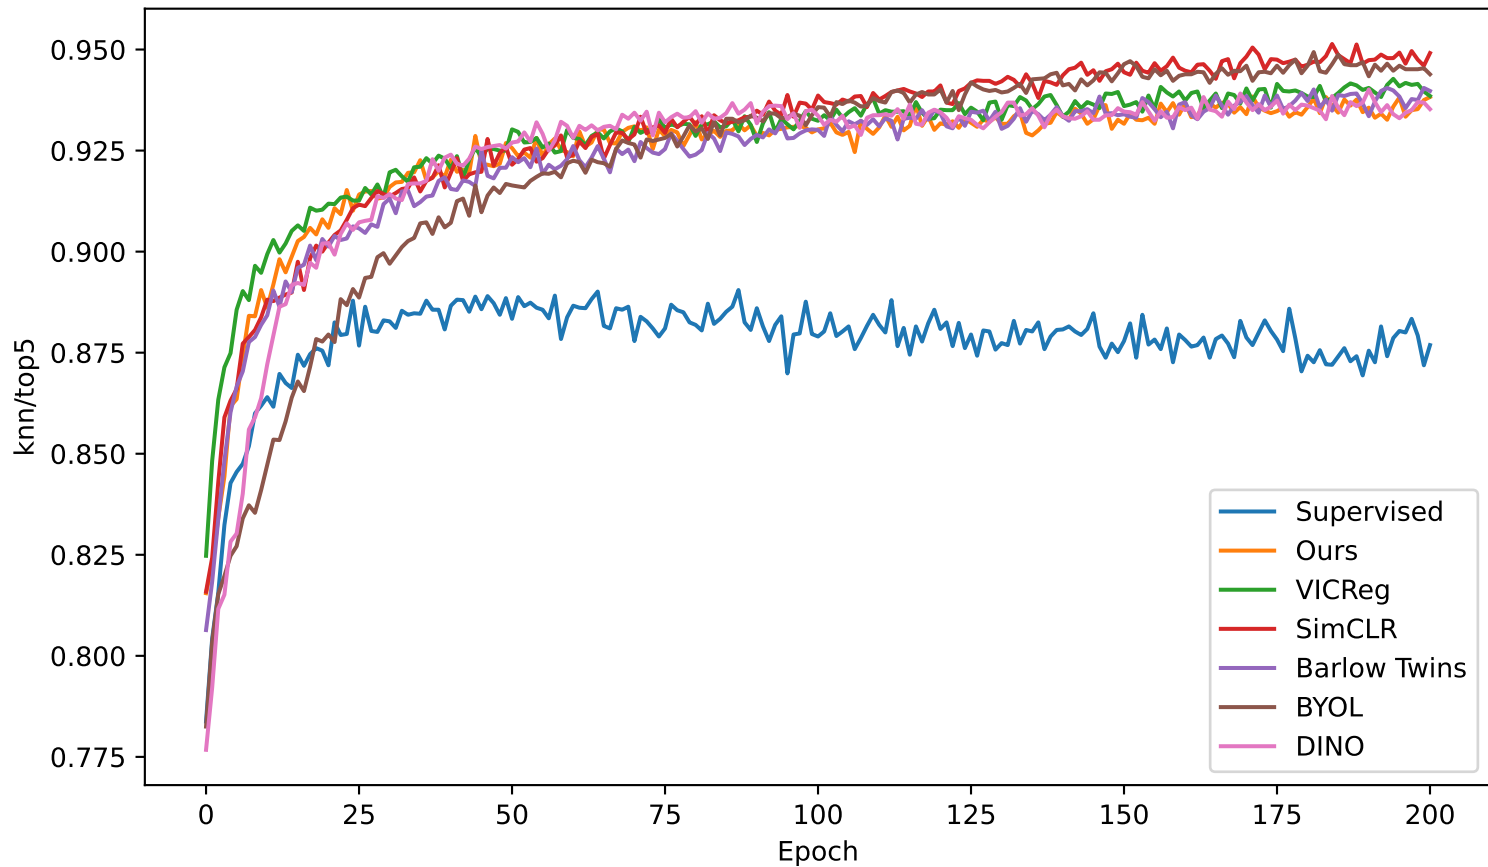

Supplement: supplementary_material [file stl10_resnet18_knn_top5.pdf › coarse_reps_iclr/reports/figs/stl10_resnet18_knn_top5.pdf]

STL10 RN18 — Lin Top1

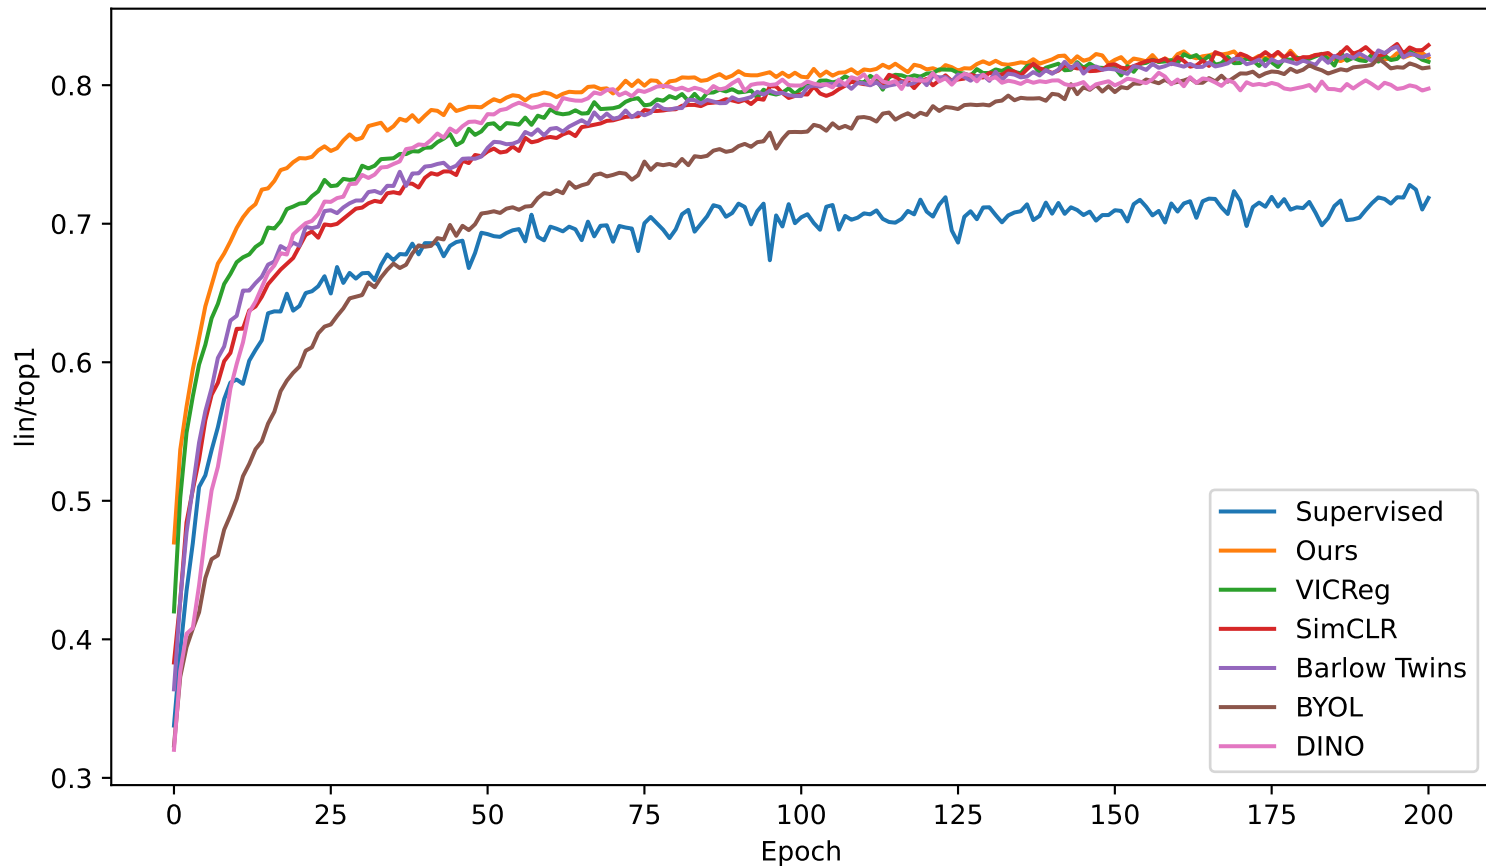

Supplement: supplementary_material [file stl10_resnet18_lin_top1.pdf › coarse_reps_iclr/reports/figs/stl10_resnet18_lin_top1.pdf]

STL10 RN18 — Lin Top5

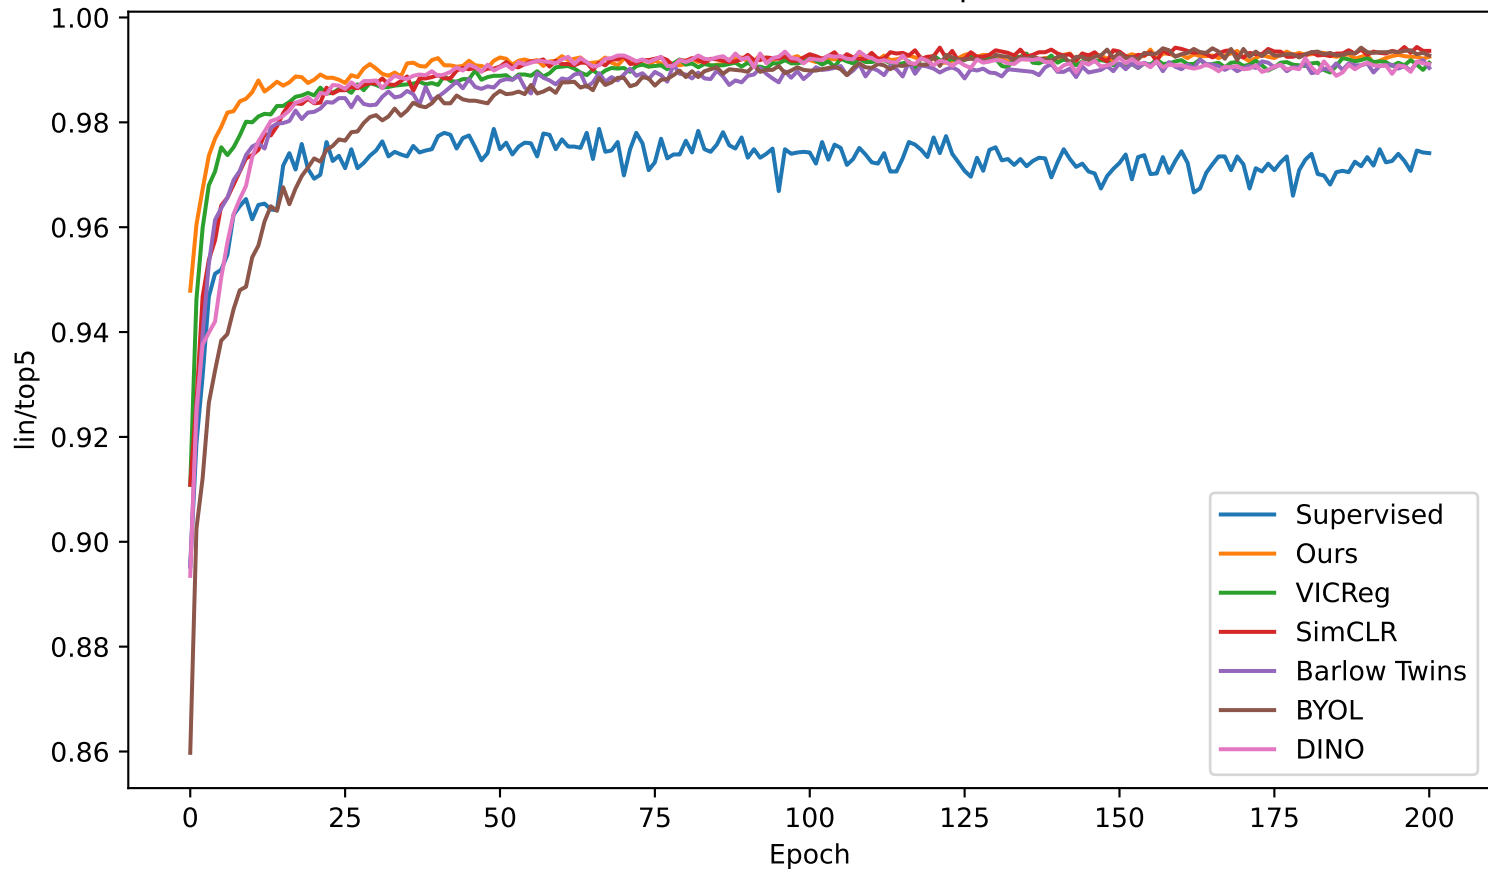

Supplement: supplementary_material [file stl10_resnet18_lin_top5.pdf › coarse_reps_iclr/reports/figs/stl10_resnet18_lin_top5.pdf]

Linear Accuracy over Epochs by  $\kappa$  (kappa)

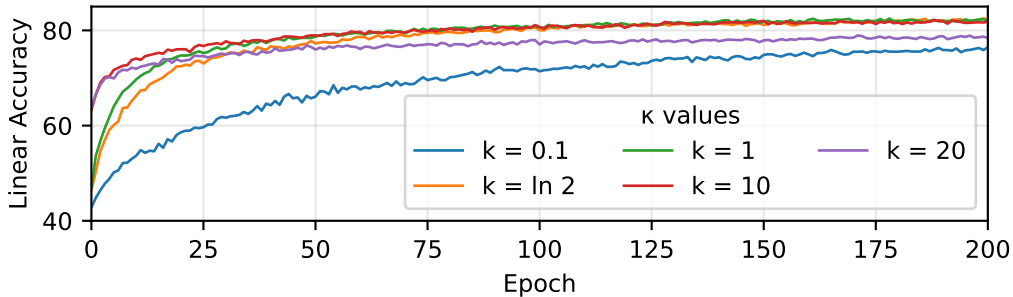

Supplement: supplementary_material [file kappa.pdf › coarse_reps_iclr/reports/kappa-stl10/kappa.pdf]

LC25000 RN18 — Knn Top1

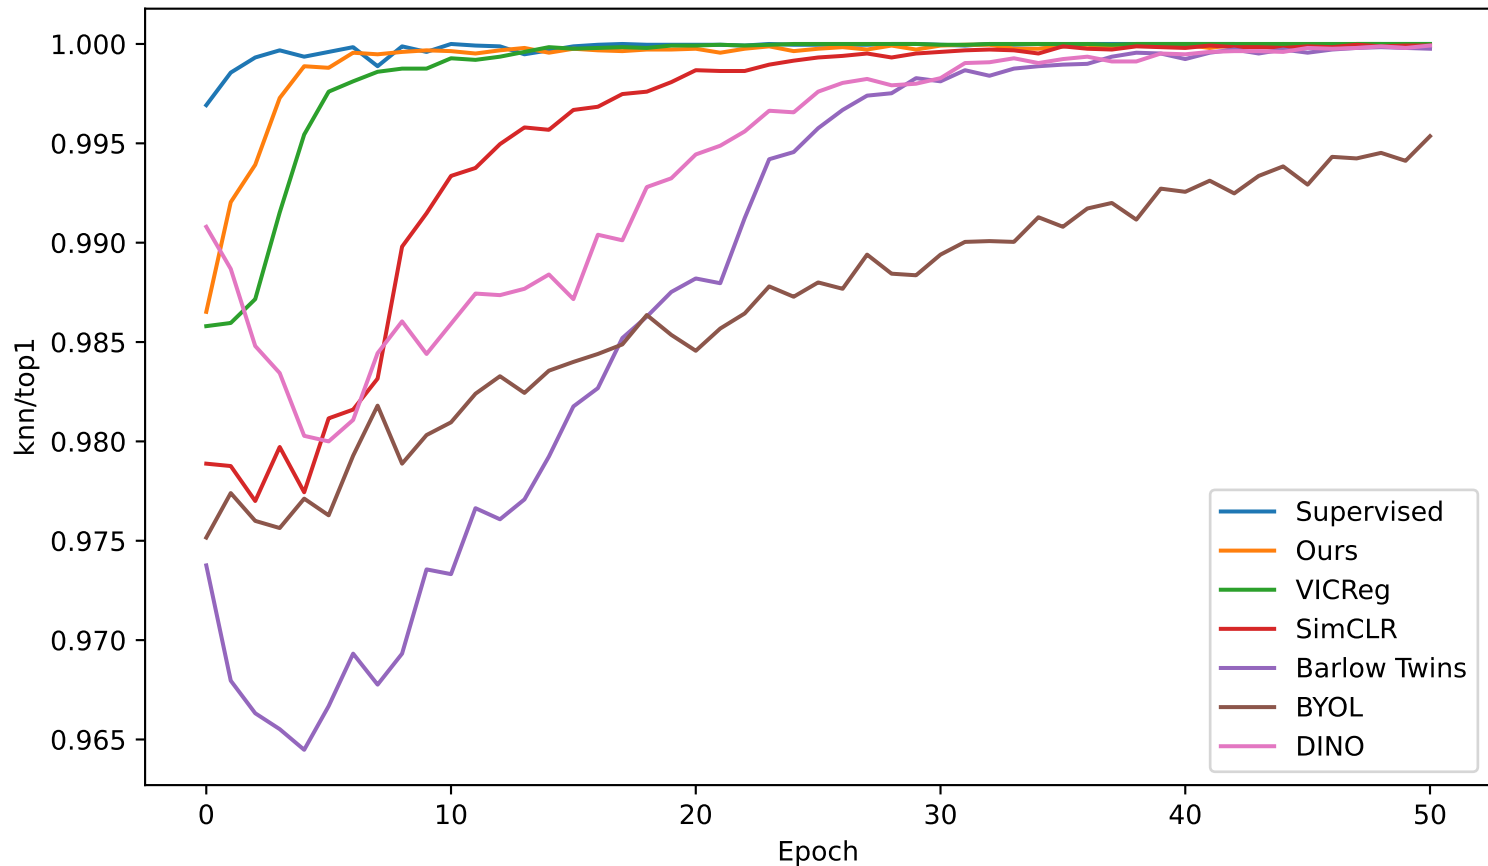

Supplement: supplementary_material [file lc25000_resnet18_knn_top1.pdf › coarse_reps_iclr/reports/lc25000-figs/lc25000_resnet18_knn_top1.pdf]

LC25000 RN18 — Knn Top5

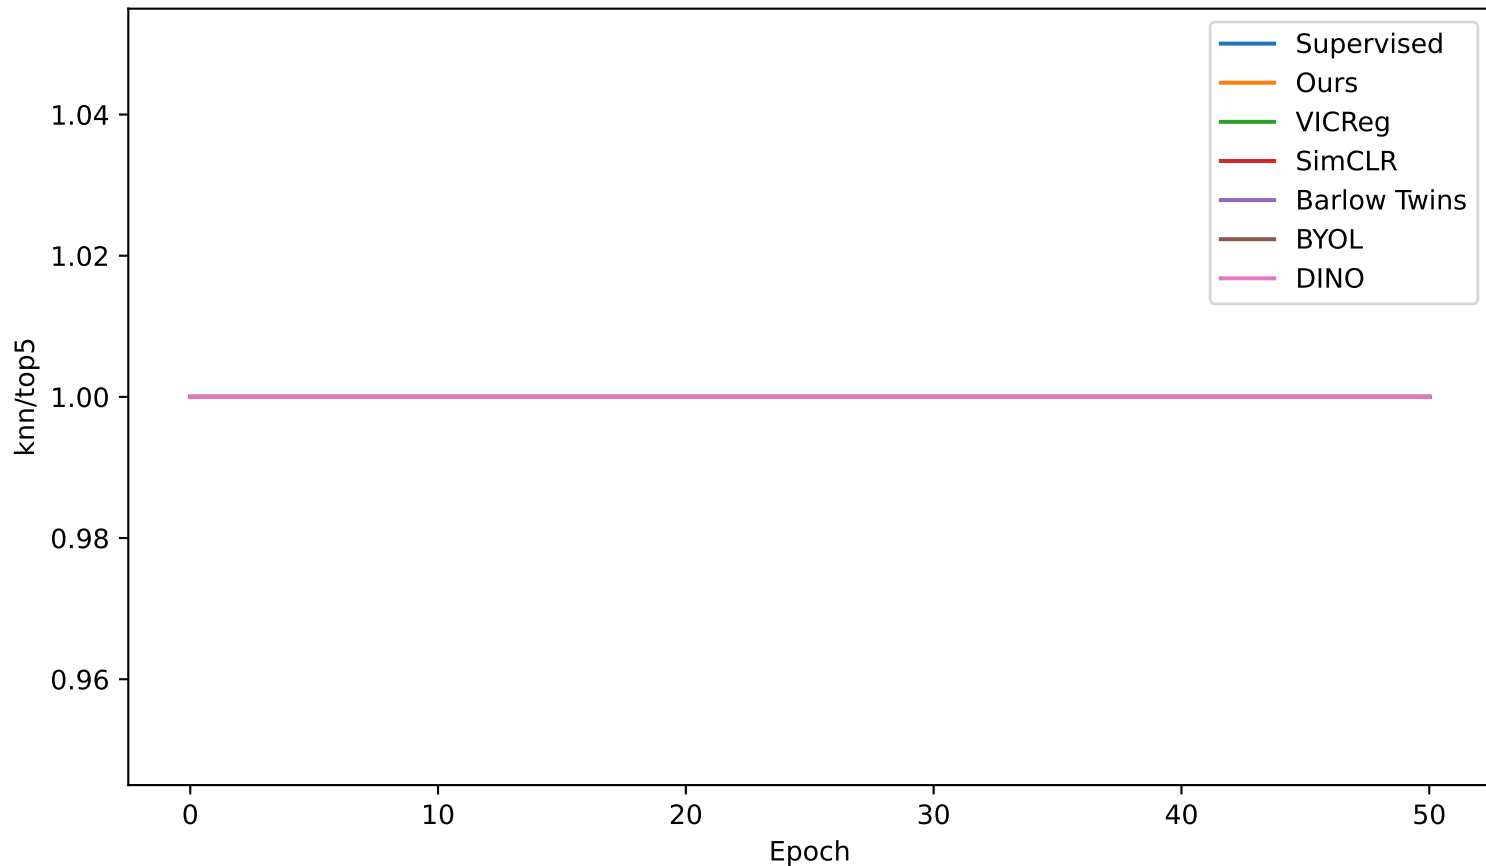

Supplement: supplementary_material [file lc25000_resnet18_knn_top5.pdf › coarse_reps_iclr/reports/lc25000-figs/lc25000_resnet18_knn_top5.pdf]

LC25000 RN18 — Lin Top1

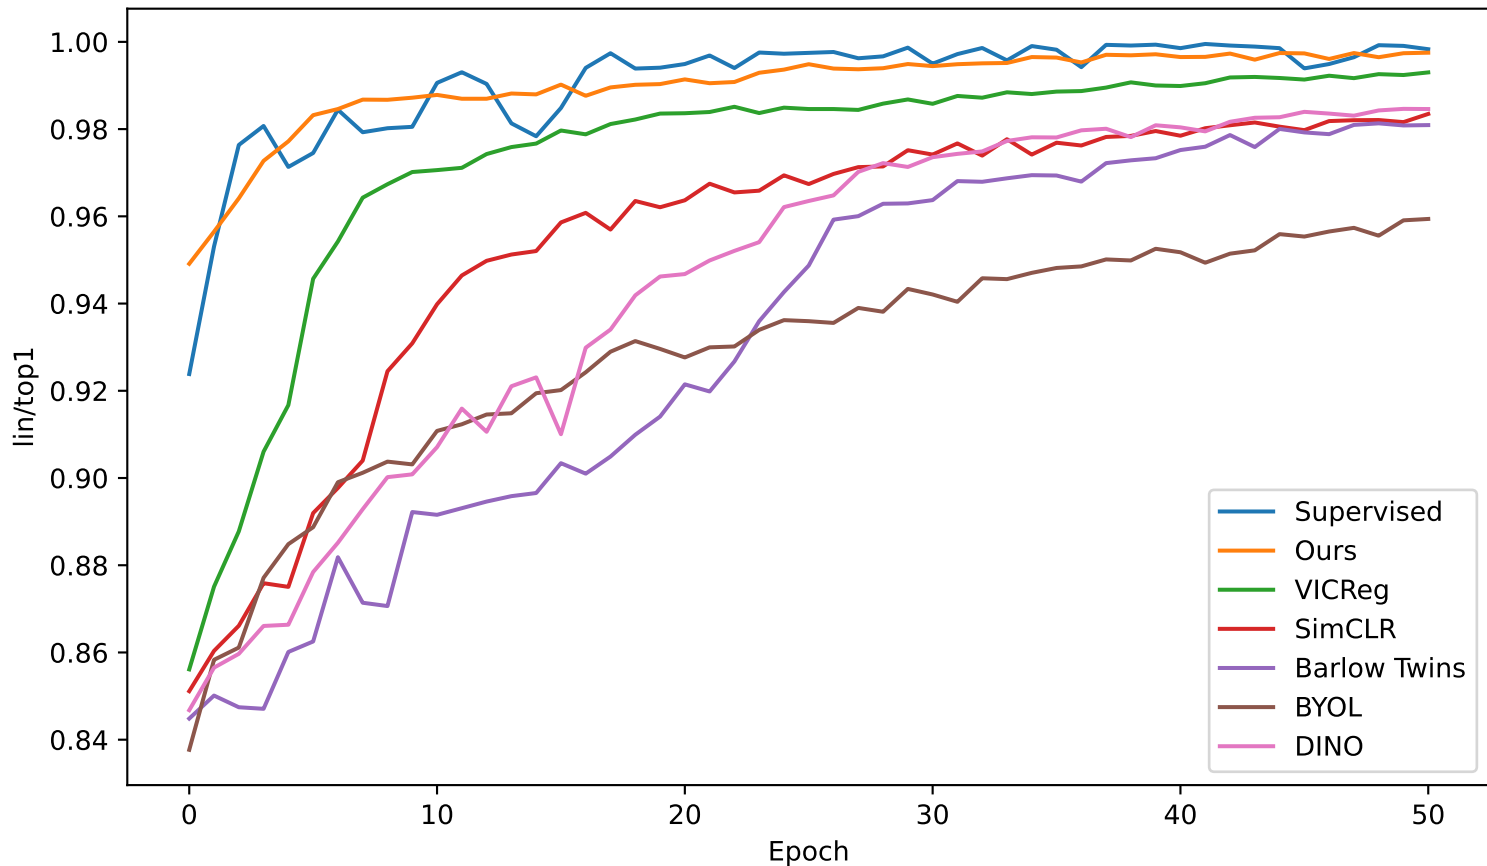

Supplement: supplementary_material [file lc25000_resnet18_lin_top1.pdf › coarse_reps_iclr/reports/lc25000-figs/lc25000_resnet18_lin_top1.pdf]

LC25000 RN18 — Lin Top5

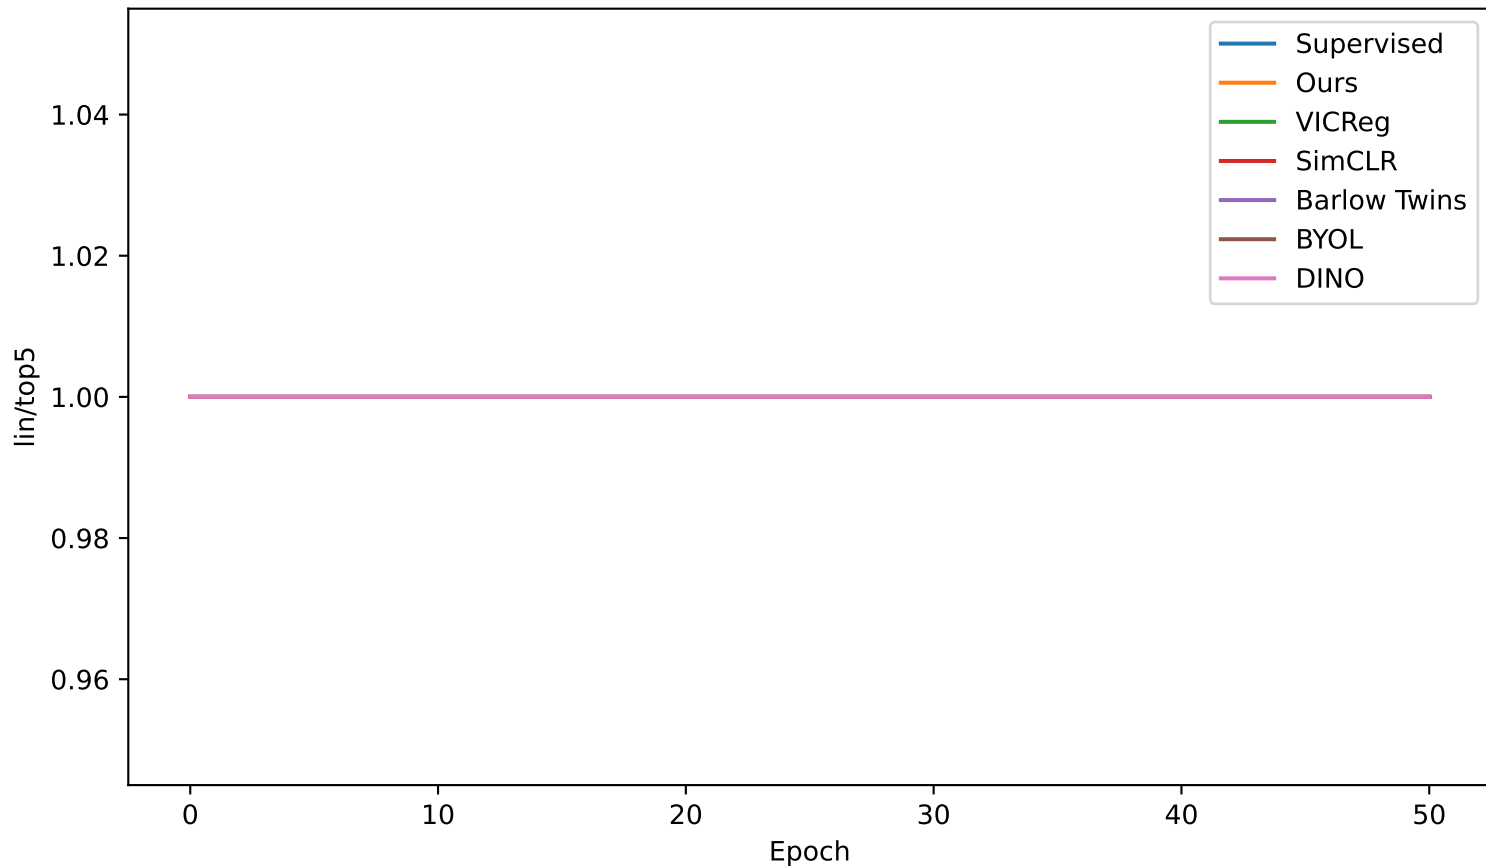

Supplement: supplementary_material [file lc25000_resnet18_lin_top5.pdf › coarse_reps_iclr/reports/lc25000-figs/lc25000_resnet18_lin_top5.pdf]

Training Process for val\_metrics/lin\_top1

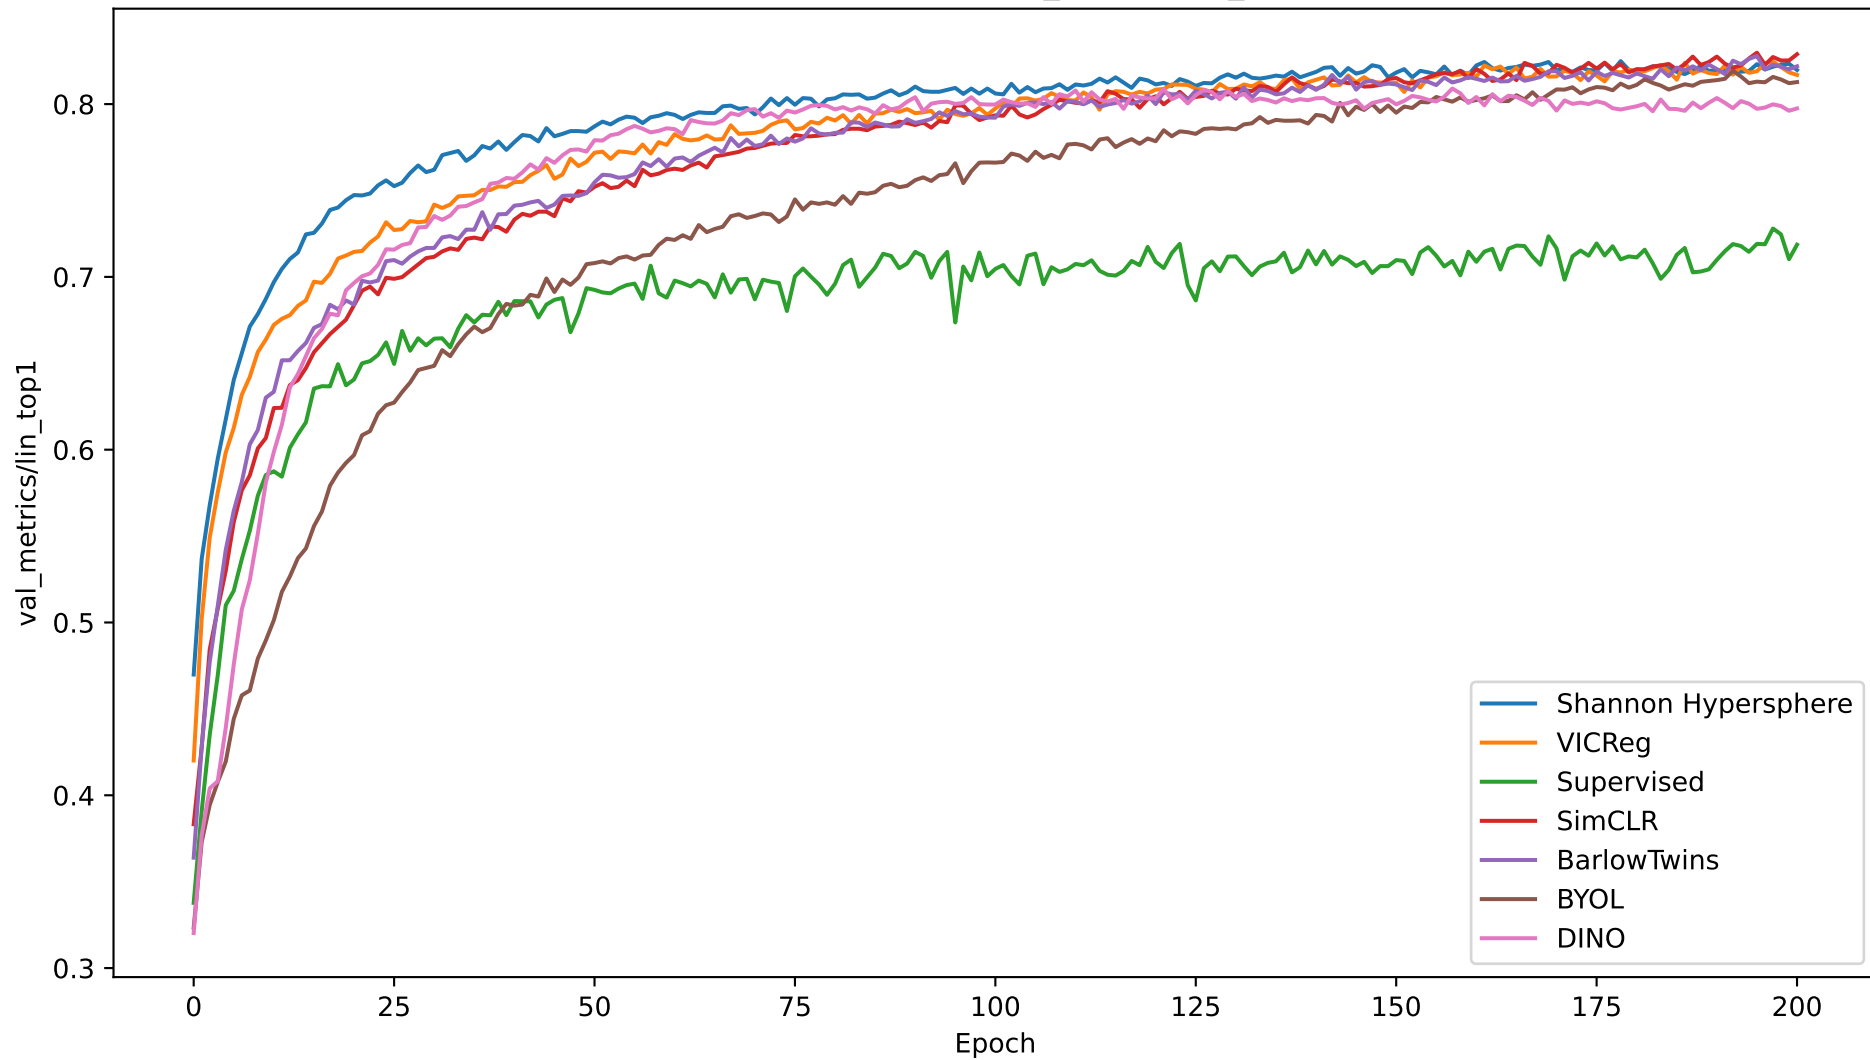

Supplement: supplementary_material [file training_process_val_metrics_lin_top1.pdf › coarse_reps_iclr/reports/training_process_val_metrics_lin_top1.pdf]
